# Supplementary material for: Maternal Stress, Early Life Factors and Infant Salivary Cortisol Levels
Source: MDPI journal article supplement (doi:10.3390/children9050623), 2022-04-27
Supplement: s1 [file s1]

# Maternal Stress, Early Life Factors and Infant Salivary Cortisol Levels

Caroline-Aleksi Olsson Mägi <sup>1,2,\*</sup>, Åshild Wik Desprée <sup>3,4</sup>, Milada Cvancarova Småstuen <sup>4</sup>, Catarina Almqvist <sup>2,5</sup>, Fuad Bahram <sup>6</sup>, Egil Bakkeheim <sup>7</sup>, Anders Bjerg <sup>1,8</sup>, Kari Glavin <sup>4</sup>, Berit Granum <sup>9</sup>, Guttorm Haugen <sup>3,10</sup>, Gunilla Hedlin <sup>1,2</sup>, Christine Monceyron Jonassen <sup>11,12</sup>, Karin C. Lødrup Carlsen <sup>3,7</sup>, Eva Maria Rehbinder <sup>13</sup>, Leif-Bjarte Rolfsjord <sup>7,14</sup>, Anne Cathrine Staff <sup>3,10</sup>, Håvard Ove Skjerven <sup>3,7</sup>, Riyas Vettukattil <sup>3,7</sup>, Björn Nordlund <sup>1,2</sup> and Cilla Söderhäll <sup>1,2</sup>

- <sup>1</sup> Department of Women's and Children's Health, Karolinska Institutet, SE-171 77 Stockholm, Sweden; bjerg.anders@gmail.com (A.B.); gunilla.hedlin@ki.se (G.H.); bjorn.nordlund@ki.se (B.N.); cilla.soderhall@ki.se (C.S.)
  - <sup>2</sup> Astrid Lindgren Children's Hospital, Karolinska University Hospital, SE-171 64 Stockholm, Sweden; catarina.almqvist@ki.se
  - <sup>3</sup> Faculty of Medicine, Institute of Clinical Medicine, University of Oslo, NO-0424 Oslo, Norway; ashild.desprée@vid.no (Å.W.D.); g.n.haugen@medisin.uio.no (G.H.); k.c.l.carlsen@medisin.uio.no (K.C.L.C.); uxnnaf@ous-hf.no (A.C.S.); h.o.skjerven@medisin.uio.no (H.O.S.); riyas.vettukattil@medisin.uio.no (R.V.)
  - <sup>4</sup> Faculty of Health, VID Specialized University, NO-0424 Oslo, Norway; milasm@oslomet.no (M.C.S.); kari.glavin@vid.no (K.G.)
  - <sup>5</sup> Department of Medical Epidemiology and Biostatistics, Karolinska Institutet, SE-171 77 Stockholm, Sweden
  - <sup>6</sup> Research Centre, Stockholm South General Hospital, SE-118 83 Stockholm, Sweden; fuad.bahram@ki.se
  - <sup>7</sup> Division of Paediatric and Adolescent Medicine, Oslo University Hospital, NO-0424 Oslo, Norway; uxbake@ous-hf.no (E.B.); leif.bjarte.rolfsjord@sykehuset-innlandet.no (L.-B.R.)
  - <sup>8</sup> Martina Children's Hospital, SE-114 86 Stockholm, Sweden
  - <sup>9</sup> Department of Chemical Toxicology, Norwegian Institute of Public Health, NO-0213 Oslo, Norway; berit.granum@fhi.no
  - <sup>10</sup> Division of Obstetrics and Gynaecology, Oslo University Hospital, NO-0424 Oslo, Norway
  - <sup>11</sup> Faculty of Chemistry, Biotechnology and Food Science, Norwegian University of Life Sciences, NO-1430 Ås, Norway; christine.monceyron.jonassen@so-hf.no
  - <sup>12</sup> Genetic Unit, Centre for Laboratory Medicine, Østfold Hospital Trust, NO 1714 Kalnes, Norway
  - <sup>13</sup> Department of Dermatology and Vaenerology, Oslo University Hospital, NO-0424 Oslo, Norway; e.m.rehbinder@ous-research.no
  - <sup>14</sup> Department of Paediatric and Adolescent Medicine Elverum, Innlandet Hospital Trust, NO-2381 Brumunddal, Norway
- \* Correspondence: caroline-aleksi.olsson.magi@ki.se

**Citation:** Olsson Mägi, C.-A.; Wik Desprée, Å.; Småstuen, M.C.; Almqvist, C.; Bahram, F.; Bakkeheim, E.; Bjerg, A.; Glavin, K.; Granum, B.; Haugen, G.; et al. Maternal Stress, Early Life Factors and Infant Salivary Cortisol Levels. *Children* **2022**, *9*, 623. <https://doi.org/10.3390/children9050623>

Academic Editor: Evalotte Mörelus

Received: 28 February 2022

Accepted: 20 April 2022

Published: 27 April 2022

**Publisher's Note:** MDPI stays neutral with regard to jurisdictional claims in published maps and institutional affiliations.

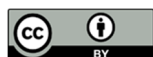

**Copyright:** © 2022 by the authors. Submitted for possible open access publication under the terms and conditions of the Creative Commons Attribution (CC BY) license (<https://creativecommons.org/licenses/by/4.0/>).

**Supplementary Figure S1.**

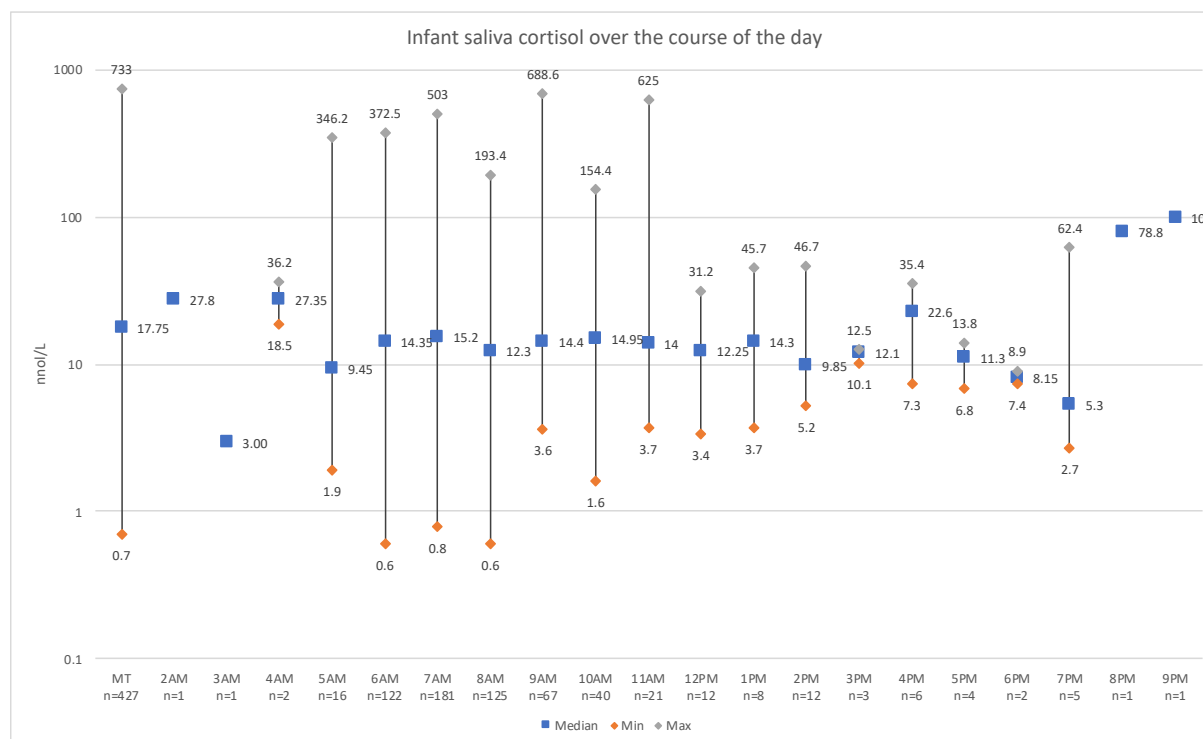

Supplementary Figure S1. Infant saliva cortisol (nmol/L) median levels related to sampling time ( $n = 1057$ ) over 24 h. Infant saliva cortisol values are given in median (blue large squares) and min-max (grey and orange small squares). MT=missing time of saliva sampling ( $n = 427$ ).

**Supplementary Table S1.** Univariate multinomial logistic regression model analysis of possible associations of factors in pregnancy, birth and early life and infant salivary cortisol at three months of age ( $n=1057$ ). Results are presented as Odds Ratio (OR), 95 % Confidence intervals (95% CI) and p-value (p). Univariate multinomial logistic reference category  $<5.50$  nmol/L,  $n = 266$ )

|                            | ISC 5.51-15.35 nmol/L ( $n = 263$ ) |                  |             | ISC 15.36-24.93 nmol/L ( $n = 265$ ) |                  |             | ISC $>24.94$ nmol/L ( $n = 263$ ) |                  |             |
|----------------------------|-------------------------------------|------------------|-------------|--------------------------------------|------------------|-------------|-----------------------------------|------------------|-------------|
|                            | OR                                  | 95% CI           | p           | OR                                   | 95% CI           | p           | OR                                | 95% CI           | p           |
| Gestational age, birth     | 1.00                                | 0.99-1.03        | 0.38        | 1.00                                 | 0.99-1.03        | 0.48        | 1.00                              | 0.99-1.03        | 0.54        |
| Cortisol, sampling age     | 1.02                                | 0.95-1.09        | 0.59        | 1.03                                 | 0.96-1.10        | 0.39        | 1.04                              | 0.98-1.11        | 0.20        |
| <b>Birth weight*</b>       | <b>1.01</b>                         | <b>1.00-1.09</b> | <b>0.05</b> | <b>1.03</b>                          | <b>1.00-1.07</b> | <b>0.09</b> | <b>1.05</b>                       | <b>1.01</b>      | <b>0.02</b> |
| Maternal age               | 0.99                                | 0.95-1.04        | 0.73        | 0.98                                 | 0.94-1.02        | 0.34        | 0.98                              | 0.94-1.02        | 0.33        |
| Girl                       | 0.98                                | 0.70-1.37        | 0.9         | 0.96                                 | 0.69-1.35        | 0.38        | 0.91                              | 0.64-1.27        | 0.57        |
| Boy (ref.)                 | 1.00                                |                  |             | 1.00                                 |                  |             | 1.00                              |                  |             |
| Induced birth start        | 1.04                                | 0.69-1.55        | 0.86        | 1.07                                 | 0.72-1.60        | 0.74        | 0.84                              | 0.55-1.27        | 0.41        |
| Natural birth start (ref.) | 1.00                                |                  |             | 1.00                                 |                  |             | 1.00                              |                  |             |
| Cesarean section           | <b>0.61</b>                         | <b>0.37-0.99</b> | <b>0.05</b> | 0.86                                 | 0.54-1.35        | 0.50        | 1.20                              | 0.78-1.85        | 0.41        |
| Vaginal birth (ref.)       | 1.00                                |                  |             | 1.00                                 |                  |             | 1.00                              |                  |             |
| Food intervention          | 1.16                                | 0.68-2.00        | 0.58        | 1.34                                 | 0.79-2.28        | 0.28        | 1.08                              | 0.63-1.86        | 0.78        |
| Food and bath intervention | 0.84                                | 0.48-1.47        | 0.55        | 1.04                                 | 0.61-1.78        | 0.89        | 1.17                              | 0.69-2.00        | 0.55        |
| Bath Intervention          | 1.00                                | 0.59-1.69        | 1.00        | 0.77                                 | 0.45-1.32        | 0.34        | 0.74                              | 0.43-1.27        | 0.27        |
| No intervention (ref.)     | 1.00                                |                  |             | 1.00                                 |                  |             | 1.00                              |                  |             |
| Not living with a partner  | 0.54                                | 0.29-1.01        | 0.05        | <b>0.51</b>                          | <b>0.27-0.95</b> | <b>0.03</b> | <b>0.48</b>                       | <b>0.25-0.91</b> | <b>0.02</b> |
| Married/cohabitant (ref.)  | 1.00                                |                  |             | 1.00                                 |                  |             | 1.00                              |                  |             |

|                          |      |           |      |             |                  |             |             |                  |             |
|--------------------------|------|-----------|------|-------------|------------------|-------------|-------------|------------------|-------------|
| Low family income        | 0.76 | 0.48-1.25 | 0.30 | 1.01        | 0.63-1.59        | 0.99        | 0.91        | 0.57-1.44        | 0.91        |
| Income >600.000 (ref.)   | 1.00 |           |      | 1.00        |                  |             | 1.00        |                  |             |
| Low maternal education   | 0.92 | 0.51-1.67 | 0.79 | 1.28        | 0.73-2.23        | 0.39        | 1.15        | 0.65-2.03        | 0.63        |
| University < (ref.)      | 1.00 |           |      | 1.00        |                  |             | 1.00        |                  |             |
| First child              | 1.15 | 0.80-1.55 | 0.45 | 1.07        | 0.74-1.53        | 0.73        | 1.02        | 0.71-1.46        | 0.97        |
| Previous children        | 1.00 |           |      | 1.00        |                  |             | 1.00        |                  |             |
| Maternal nicotine 3m     | 0.55 | 0.24-1.28 | 0.17 | 0.91        | 0.43-1.90        | 0.80        | 0.93        | 0.44-1.94        | 0.84        |
| No nicotine (ref.)       | 1.00 |           |      | 1.00        |                  |             | 1.00        |                  |             |
| Mixed fed                | 1.03 | 0.72-1.49 | 0.86 | 0.77        | 0.53-1.11        | 0.16        | <b>0.66</b> | <b>0.45-9.95</b> | <b>0.02</b> |
| Breastfed only (ref.)    | 1.00 |           |      | 1.00        |                  |             | 1.00        |                  |             |
| Colic 3 m                | 0.90 | 0.34-2.37 | 0.83 | 0.69        | 0.24-1.96        | 0.48        | 0.94        | 0.36-2.49        | 0.90        |
| No reported colic (ref.) | 1.00 |           |      | 1.00        |                  |             | 1.00        |                  |             |
| Abdominal pain 3 m       | 1.04 | 0.67-1.61 | 0.86 | 1.08        | 0.70-1.68        | 0.72        | 1.16        | 0.75-1.80        | 0.50        |
| No abdominal pain (ref.) | 1.00 |           |      | 1.00        |                  |             | 1.00        |                  |             |
| PSS 18w                  | 1.02 | 0.99-1.04 | 0.19 | 1.00        | 0.98-1.02        | 0.96        | 1.00        | 0.98-1.03        | 0.93        |
| PSS 34w                  | 1.01 | 0.99-1.04 | 0.33 | 1.00        | 0.98-1.03        | 0.74        | 1.00        | 0.98-1.02        | 0.86        |
| PSS 3m                   | 1.00 | 0.98-1.03 | 0.85 | 0.99        | 0.97-1.02        | 0.61        | 0.99        | 0.96-1.01        | 0.35        |
| High PSS 18w 29          | 1.10 | 0.68-1.77 | 0.71 | 1.07        | 0.66-1.73        | 0.79        | 0.93        | 0.57-1.53        | 0.79        |
| <b>High PSS 34w 29</b>   | 1.07 | 0.63-1.84 | 0.80 | <b>1.57</b> | <b>0.95-2.61</b> | <b>0.08</b> | 0.98        | 0.57-1.70        | 0.95        |
| High PSS 3m 29           | 1.19 | 0.63-2.26 | 0.60 | 0.87        | 0.44-1.74        | 0.69        | 0.79        | 0.38-1.57        | 0.47        |
| Low stress <29 (ref.)    | 1.00 |           |      | 1.00        |                  |             | 1.00        |                  |             |

**Supplementary Table S2.** Mann–Whitney U-test (pairwise with reference categorie (ref)) of background factors in pregnancy, at birth and by three months infant age and differences in median infant saliva cortisol at three moths age. Number are presented as number (*n*), present (%) and *p*-value. Median saliva cortisol and inter quartile range (IQR). (*n* = 1057).

|                                 |                            | Study cohort ( <i>n</i> = 1057) |               | <i>p</i> -value |
|---------------------------------|----------------------------|---------------------------------|---------------|-----------------|
|                                 |                            | <i>n</i> (%)                    | median (IQR)  |                 |
| Infant sex                      | Boy (ref)                  | 543 (51.4)                      | 15.50 (15.90) | 0.69            |
|                                 | Girl                       | 514 (48.6)                      | 15.10 (14.58) |                 |
| Birth start                     | Spontaneous (ref)          | 803 (75.9)                      | 15.50 (16.87) | 0.59            |
|                                 | Medical induced            | 240 (22.7)                      | 14.90 (13.42) |                 |
| Birth method                    | Vaginal (ref)              | 881 (83.3)                      | 15.50 (16.87) | 0.16            |
|                                 | Caesarean section          | 176(16.7)                       | 14.90 (13.42) |                 |
| PreventADALL intervention group | No intervention (ref)      | 214 (20.5)                      | 16.00 (16.60) | 0.25            |
|                                 | Bath                       | 212 (20.1)                      | 13.60 (13.70) |                 |
|                                 | Food                       | 227 (21.5)                      | 16.50 (18.30) |                 |
|                                 | Bath/Food                  | 209 (19.8)                      | 16.50 (14.90) |                 |
| Marital status                  | Married/cohabitant (ref)   | 979 (92.6)                      | 15.50 (15.40) | 0.08            |
|                                 | Not living with a partner  | 78 (7.4)                        | 12.10 (14.10) |                 |
| Yearly family income            | >600.000 (ref)             | 894 (84.6)                      | 15.20 (15.33) | 0.72            |
|                                 | Less than 600.000          | 163 (15.4)                      | 15.85 (16.33) |                 |
| Maternal education              | University or higher (ref) | 950 (89.9)                      | 15.2 (15.00)  | 0.30            |
|                                 | High school                | 107 (10.1)                      | 17.50 (16.83) |                 |
| Parity                          | First child (ref)          | 341 (32.3)                      | 15.60 (17.00) | 0.88            |
|                                 | One or more children       | 716 (67.7)                      | 15.30 (14.75) |                 |

|                                  |                     |            |               |       |
|----------------------------------|---------------------|------------|---------------|-------|
| Maternal nicotine use by 3-month | No (ref)            | 880 (83.3) | 14.8 (14.66)  | 0.24  |
|                                  | Yes                 | 53 (5.0)   | 17.10 (19.10) |       |
| Breastfeeding by 3-month         | Mixed feeding (ref) | 406 (38.4) | 16.35 (17.35) | <0.01 |
|                                  | Only breastfed      | 527 (49.8) | 13.90 (13.00) |       |
| Doctors diagnosed colic 3-month  | No (ref)            | 902 (85.3) | 15.00 (14.80) | 0.98  |
|                                  | Yes                 | 31 (2.9)   | 13.50 (20.1)  |       |
| Infant abdominal pains 3-month   | No (ref)            | 724 (68.5) | 14.8 (14.65)  | 0.69  |
|                                  | Yes                 | 209 (19.8) | 15.5 (16.05)  |       |

**Supplementary Table S3.** Mann–Whitney U-test stratified for infant biological sex of median infant saliva cortisol at three months age and maternal background factors and early life factors. Boy ( $n = 543$ ) and Girl ( $n = 514$ ).

|                                 |                           | Boy          |               |       | Girl         |                |      |
|---------------------------------|---------------------------|--------------|---------------|-------|--------------|----------------|------|
|                                 |                           | <i>n</i> (%) | median (IQR)  | Sig.  | <i>n</i> (%) | median (IQR)   | sig. |
| Saliva cortisol (nmol/L)        |                           | 543          | 15.5 (15.90)  |       | 514          | 15.10 (14.58)  | 0.69 |
| Marital status                  | Married/co-habitant       | 500          | 15.70 (16.9)  |       | 479          | 15.2 (14.80)   |      |
|                                 | Not living with a partner | 43           | 11.70 (14.10) | 0.13  | 35           | 12.10 (15.50)  | 0.48 |
| Maternal education              | University or higher      | 489          | 15.20 (15.50) |       | 461          | 15.00 (14.70)  |      |
|                                 | High school               | 54           | 19.70 (18.60) | 0.28  | 53           | 15.60 (14.60)  | 1.00 |
| Yearly family income            | >600.000 NOK/SEK          | 459          | 15.40 (15.40) |       | 435          | 15.00 (15.00)  |      |
|                                 | Less than 600.000 NOK/SEK | 84           | 16.15 (18.40) | 0.49  | 79           | 15.20 (14.10)  | 1.00 |
| Parity                          | First child               | 170          | 15.25 (19.00) |       | 171          | 15.70 (15.60)  |      |
|                                 | One or more children      | 373          | 15.50 (15.20) | 0.95  | 343          | 15.00 (13.40)  | 0.85 |
| Birth start                     | Spontaneous               | 420          | 15.20 (17.50) |       | 383          | 15.90 (16.70)  |      |
|                                 | Medical induced           | 119          | 16.20 (17.50) | 0.66  | 121          | 13.80 (13.10)  | 0.16 |
| Birth method                    | Vaginal                   | 448          | 15.40 (15.20) |       | 433          | 14.70 (13.50)  |      |
|                                 | Caesarean section         | 95           | 15.50 (18.70) | 0.92  | 81           | 17.40 (22.10)  | 0.09 |
| PreventADALL intervention group | No intervention           | 104          | 14.45 (20.00) |       | 110          | 16.10 (12.50)  |      |
|                                 | Bath                      | 96           | 12.45 (20.00) | 0.48  | 116          | 14.55 (16.40)  | 0.35 |
|                                 | Food                      | 125          | 18.00 (17.10) | 0.16  | 102          | 15.70 (13.30)  | 0.88 |
|                                 | Bath and Food             | 110          | 17.60 (17.20) | 0.13  | 99           | 15.90 (20.10)  | 0.94 |
| Breastfeeding by 3-month        | Mixed feeding             | 220          | 17.25 (17.10) |       | 186          | 15.25 (17.70)  |      |
|                                 | Only breastfed            | 263          | 13.20 (13.00) | <0.01 | 264          | 14.20 (13.10)  | 0.31 |
| Doctors diagnosed colic 3-month | No                        | 467          | 15.40 (14.50) |       | 435          | 14.70 (15.20)  |      |
|                                 | Yes                       | 16           | 13.10 (18.60) | 0.47  | 15           | 17.00 (22.60)  | 0.97 |
| Infant abdominal pains 3-month  | No                        | 367          | 15.40 (15.30) |       | 357          | 14.60 (13.70)  |      |
|                                 | Yes                       | 116          | 15.30 (12.50) | 0.98  | 93           | 15.90 (18.90)  | 0.57 |
| PSS Pregnancy 18 weeks          | Low                       | 429          | 15.50 (15.50) |       | 417          | 15.60 (16,.70) |      |
|                                 | High                      | 84           | 17.65 (19.00) | 0.51  | 72           | 14.00 (10.50)  | 0.18 |
| PSS Pregnancy 34 weeks          | Low                       | 449          | 15.50 (16.80) |       | 434          | 14.95 (15.60)  |      |
|                                 | High                      | 71           | 17.90 (12.30) | 0.42  | 62           | 15.45 (13.20)  | 0.66 |
| PSS 3-month post-partum         | Low                       | 446          | 15.60 (15.50) |       | 416          | 14.70 (14.50)  |      |
|                                 | High                      | 37           | 13.30 (15.50) | 0.10  | 34           | 14.95 (20.90)  | 0.90 |

**Supplementary Table S4.** *T*-test of background characteristics and early life factors of included infants with saliva cortisol ( $n = 1057$ ) and infants from the original PreventADALL mother/child cohort without saliva cortisol ( $n = 1337$ ).

|                                              |                           | Included ( $n = 1057$ ) |               | Not included ( $n = 1337$ ) |               | $p$ -value |
|----------------------------------------------|---------------------------|-------------------------|---------------|-----------------------------|---------------|------------|
|                                              |                           | $n$                     | mean (SD)     | $n$                         | mean (SD)     |            |
| Maternal age, years                          |                           | 1057                    | 32.8 (4.08)   | 1337                        | 32.1 (4.18)   | <.01       |
| Gestational age, birth                       |                           | 1053                    | 40.04 (1.35)  | 1337                        | 40.06 (1.35)  | 0.81       |
| Infant birth weight, kg                      |                           | 953                     | 3.56 (0.54)   | 1301                        | 3.53 (0.54)   | 0.23       |
| PSS 18w                                      |                           | 1003                    | 20.91 (7.36)  | 1169                        | 21.37 (7.16)  | 0.14       |
| PSS 34 w                                     |                           | 1016                    | 19.97 (7.41)  | 1219                        | 20.68 (7.19)  | 0.02       |
| PSS 3 m                                      |                           | 933                     | 17.97 (7.27)  | 919                         | 18.09 (7.21)  | 0.72       |
| Saliva cortisol, maternal                    |                           | 531                     | 34.19 (42.91) | 191                         | 30.20 (14.40) | 0.21       |
| Saliva cortisol, infant (inclusion criteria) |                           | 1057                    | 32.1 (72.07)  | na                          | na            | na         |
|                                              |                           | $n$                     | %             | $n$                         | %             | $p$ -value |
| Maternal education                           | High school               | 107                     | (10.2)        | 134                         | (10.0)        | 0.93       |
|                                              | University or higher      | 950                     | (89.8)        | 1203                        | (90)          |            |
| Yearly income                                | Less than 600.000         | 164                     | (15.5)        | 176                         | (13.2)        | 0.12       |
|                                              | >600.000                  | 894                     | (84.5)        | 1162                        | (86.8)        |            |
| Marital status                               | Married/cohabitant        | 979                     | (92.5)        | 1133                        | (84.7)        | <.01       |
|                                              | Not living with a partner | 79                      | (7.5)         | 205                         | (15.3)        |            |
| Parity                                       | First child               | 341                     | (32.2)        | 317                         | (23.7)        | <.01       |
|                                              | One or more children      | 717                     | (67.8)        | 1021                        | (76.3)        |            |
| Nicotine use by 3-month                      | no                        | 880                     | (94.3)        | 869                         | (94.6)        | 0.90       |
|                                              | yes                       | 53                      | (5.7)         | 50                          | (5.4)         |            |
| Induced labor                                | no                        | 804                     | (77.0)        | 1039                        | (78.4)        | 0.44       |
|                                              | yes                       | 240                     | (23.0)        | 286                         | (21.6)        |            |
| Birth method                                 | Vaginal                   | 881                     | (83.3)        | 1117                        | (83.5)        | 0.97       |
|                                              | Caesarean section         | 176                     | (16.7)        | 221                         | (16.5)        |            |
| Infant sex                                   | Boy                       | 554                     | (51.4)        | 713                         | (53.3)        | 0.39       |
|                                              | Girl                      | 514                     | (48.6)        | 625                         | (46.7)        |            |
| Doctors diagnosed colic 3-month              | no                        | 902                     | (96.7)        | 891                         | (97.0)        | 0.84       |
|                                              | yes                       | 31                      | (3.3)         | 28                          | (3.0)         |            |
| Infant abdominal pains by 3-m                | no                        | 724                     | (77.6)        | 713                         | (77.6)        | 1.00       |
|                                              | yes                       | 209                     | (22.4)        | 206                         | (22.4)        |            |
| Breastfeeding by 3-month                     | Mixed feeding             | 406                     | (43.5)        | 435                         | (47.3)        | 0.11       |
|                                              | Exclusive breastfed       | 527                     | (56.5)        | 484                         | (52.7)        |            |
| Intervention group, bath                     | no                        | 650                     | (75.3)        | 878                         | (76.0)        | 0.76       |
|                                              | yes                       | 213                     | (24.7)        | 277                         | (24.0)        |            |
| Intervention group, bath and food group      | no                        | 441                     | (51.1)        | 615                         | (53.2)        | 0.36       |
|                                              | yes                       | 422                     | (48.9)        | 540                         | (46.8)        |            |

**Supplementary Table S5.** Spearman non-parametric correlations between maternal cortisol at 18 gestational weeks and maternal perceived stress in pregnancy at 18-, 34 weeks, and three-months infant age. Groups represent *all maternal saliva samples*, *morning sample* (05.00-10.59), *other sampling time* (11.00-04.59) and *missing sampling time*. Results are presented as numbers (*n*), correlation coefficient (*r*) and *p*-value.

|              | <i>All maternal samples</i> |                           | <i>Morning sample</i> |                           | <i>Other sampling time</i> |                           | <i>Missing sampling time</i> |                           |
|--------------|-----------------------------|---------------------------|-----------------------|---------------------------|----------------------------|---------------------------|------------------------------|---------------------------|
|              | <i>n</i>                    | <b><i>r (p-value)</i></b> | <i>n</i>              | <b><i>r (p-value)</i></b> | <i>n</i>                   | <b><i>r (p-value)</i></b> | <i>n</i>                     | <b><i>r (p-value)</i></b> |
| PSS 18 weeks | 669                         | -0.08 (0.05)*             | 475                   | -0.08(0.08)               | 34                         | 0.27 (0.18)               | 160                          | -0.05(0.56)               |
| PSS 34 weeks | 682                         | -0.04 (0.37)              | 494                   | -0.02 (0.60)              | 31                         | 0.20 (0.28)               | 157                          | -0.12 (0.13)              |
| PSS 3-month  | 586                         | -0.01 (0.77)              | 425                   | 0.01 (0.79)               | 29                         | -0.07 (0.72)              | 132                          | 0.04 (0.64)               |

\*Not significant, 0.052
